# Supplementary material for: Lipid nanocapsules functionalized with polyethyleneimine for plasmid DNA and drug co-delivery and cell imaging
Source: Royal Society of Chemistry journal article supplement (doi:10.1039/c4nr01110d), 2014-01-01
Supplement: c4nr01110d1.pdf [file c4nr01110d1.pdf]

## SUPPORTING INFORMATION

### **Lipid nanocapsules functionalized with polyethyleneimine for plasmid DNA and drug co-delivery and cell imaging**

Nadia Skandrani,<sup>1,2</sup> Alexandre Barras,<sup>1</sup> Dominique Legrand,<sup>3</sup> Tijani Gharbi,<sup>2,4</sup> Hatem Boulahdour,<sup>2,4</sup>

Rabah Boukherroub<sup>1\*</sup>

<sup>1</sup>*Institut de Recherche Interdisciplinaire (IRI, USR CNRS 3078), Parc de la Haute Borne, 50 Avenue de  
Halley, BP 70478, 59658 Villeneuve d'Ascq, France*

<sup>2</sup>*Laboratoire de Nanomédecine, Imagerie et Thérapeutique, Université de Franche-Comté, 16 Route de  
Gray, 25030 Besançon, France*

<sup>3</sup>*Unité de Glycobiologie Structurale et Fonctionnelle (UMR CNRS 8576), Institut Fédératif de  
Recherche n°147, Université Lille1, 59655 Villeneuve d'Ascq, France*

<sup>4</sup>*CHRU Jean Minjoz, 3 Bd Alexandre Fleming, 25030 Besançon, France*

\*To whom correspondence should be addressed. Tel: +33 3 62 53 17 24; Fax: +33 3 62 53 17 01; E-mail: [rabah.boukherroub@iri.univ-lille1.fr](mailto:rabah.boukherroub@iri.univ-lille1.fr)

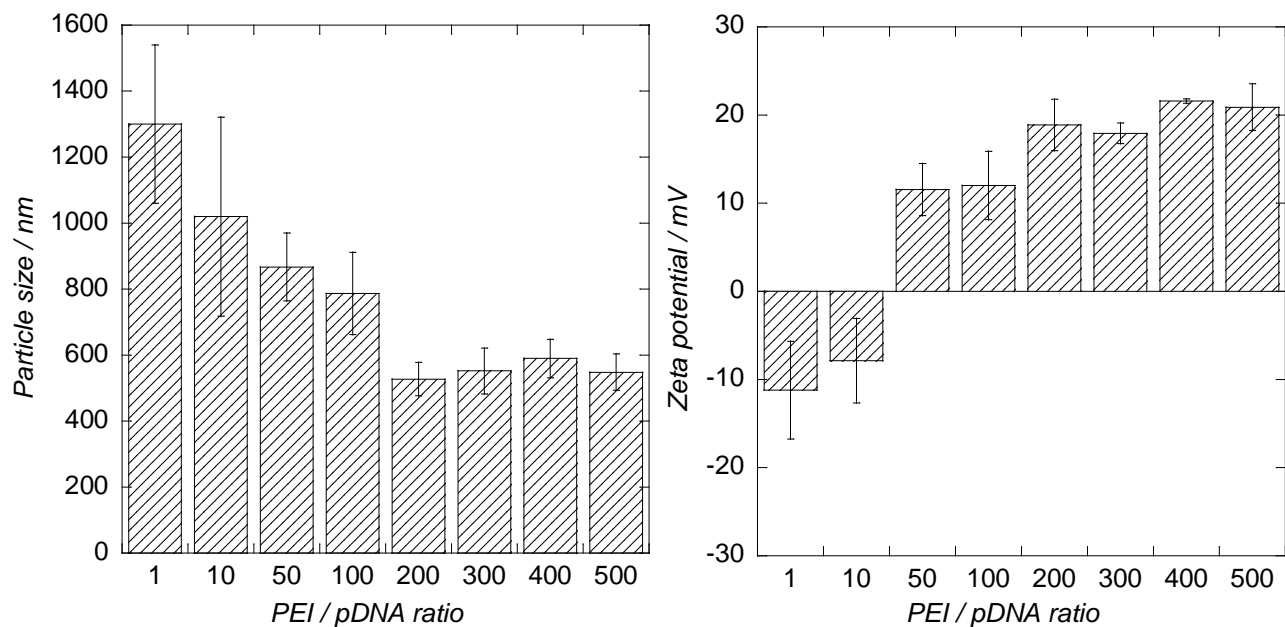

**Figure S1:** Size and zeta potential measurements of PEI/pDNA complexes in aqueous solutions (1 mL); pDNA (1  $\mu$ g) was incubated with increasing amounts of PEI for 30 min at room temperature.

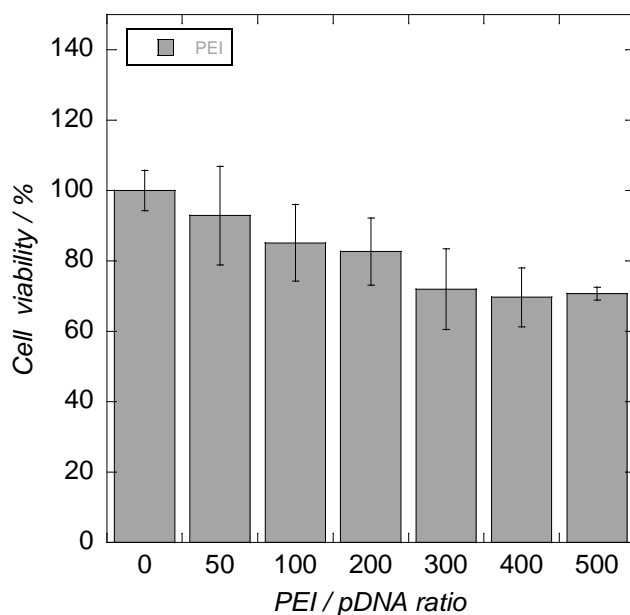

**Figure S2.** *In vitro* cytotoxicity of PEI/pDNA complexes. MTT assay data for cells and PEI/pDNA complexes at different ratios on the HEK cell culture.

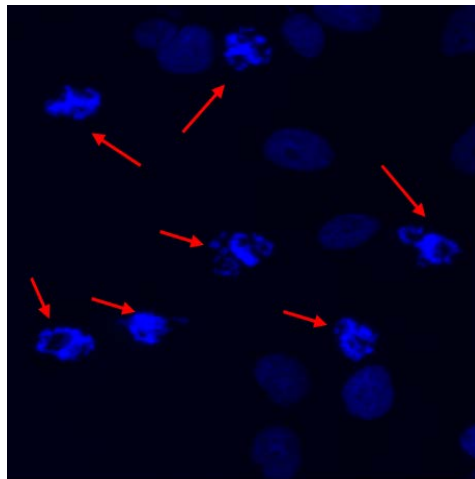

**Figure S3:** High magnification of Figure 8B (right image), corresponding to DAPI staining of HEK cells after incubation for 4 h with LNC25-PTX-T (LNC concentration 500  $\mu\text{g}/\text{mL}$ , PTX concentration 1  $\mu\text{g}/\text{mL}$ ). The red arrows point to fragmented nuclei.

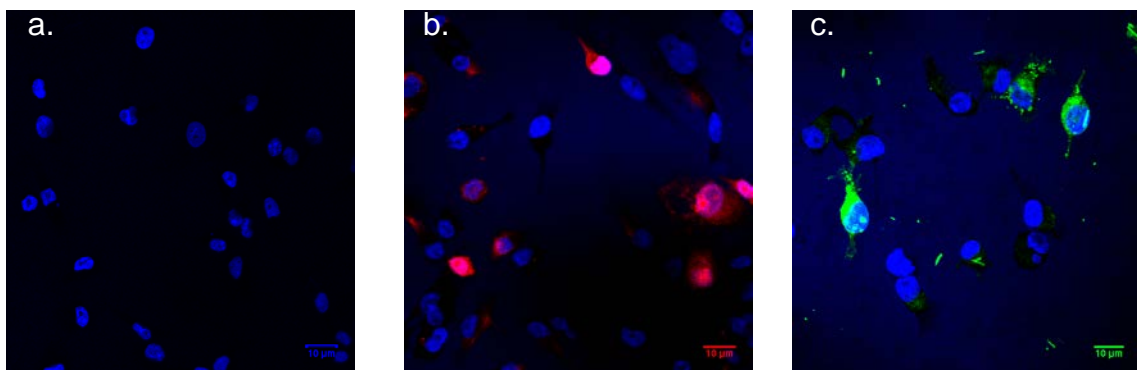

**Figure S4:** Fluorescence images of HEK cells untreated (a) as negative control, and treated with LNC-T/pDNA loaded with DiI (100  $\mu\text{g}/\text{mL}$ ) (b) and DiO (100  $\mu\text{g}/\text{mL}$ ) (c). The scale bare represents 10  $\mu\text{m}$ . The cells were fixed with 4% paraformaldehyde in PBS at room temperature for 15 min, stained with 0.1  $\mu\text{g}/\text{mL}$  DAPI in PBS at room temperature for 15 min and washed twice with PBS and water.

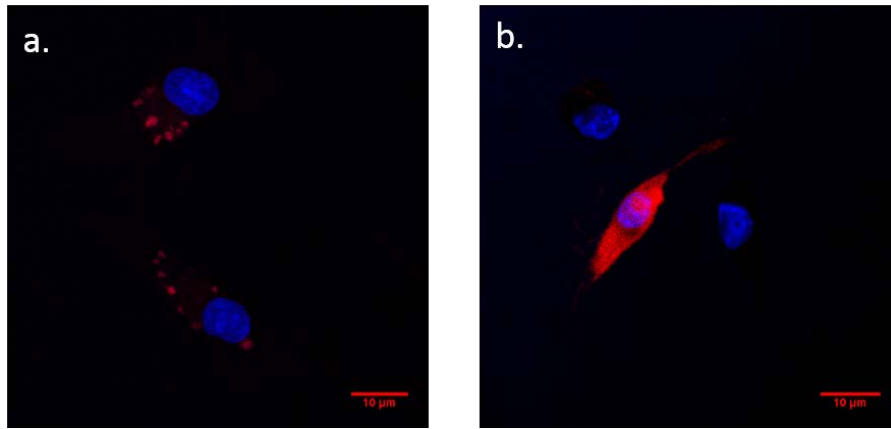

**Figure S5:** High magnification of the Figure S4b (HEK cells treated with LNC-T/pDNA loaded with DiI (100  $\mu\text{g}/\text{mL}$ ) after 1 h (a) and 4 h (b) incubation.
